# Supplementary material for: Click functionalized biocompatible gadolinium oxide core-shell nanocarriers for imaging of breast cancer cells
Source: Royal Society of Chemistry journal article supplement (doi:10.1039/d2ra00347c), 2022-01-01
Supplement: d2ra00347c1.pdf [file d2ra00347c1.pdf]

## Click Functionalized Biocompatible Gadolinium Oxide Core-shell Nanocarriers for Imaging of Breast Cancer Cells

Shifaa M. Siribbal,<sup>at</sup> Shaista Ilyas,<sup>at</sup> Alexander M. Renner,<sup>a</sup> Sumiya Iqbal,<sup>a</sup> Sergio Muñoz Vázquez,<sup>b</sup>  
Abubakar Moawia,<sup>e,f</sup> Martin Valldor,<sup>c,d</sup> Muhammad S. Hussain,<sup>e,f</sup> Klaus Schomäcker,<sup>b</sup> and Sanjay  
Mathur<sup>a\*</sup>

<sup>a</sup> Institute of Inorganic Chemistry, University of Cologne, Greinstrasse 6, 50939 Cologne, Germany

<sup>b</sup> Clinic and Polyclinic for Nuclear medicine, University of Cologne, Kerpenerstrasse 62, 50937 Cologne, Germany

<sup>c</sup> Max-Planck-Institut für Chemische Physik fester Stoffe, Nöthnitzer Strasse 40, 01187 Dresden, Germany

<sup>d</sup> Centre for Materials Science and Nanotechnology, Department of Chemistry, University of Oslo, Blindern, 0315 Oslo, Norway

<sup>e</sup> Cologne Center for Genomics (CCG), University of Cologne, Faculty of Medicine and University Hospital Cologne, 50931 Cologne, Germany

<sup>f</sup> Center for Biochemistry, Medical Faculty, University of Cologne, 50931 Cologne, Germany

\*Correspondence: [sanjay.mathur@uni-koeln.d](mailto:sanjay.mathur@uni-koeln.d)

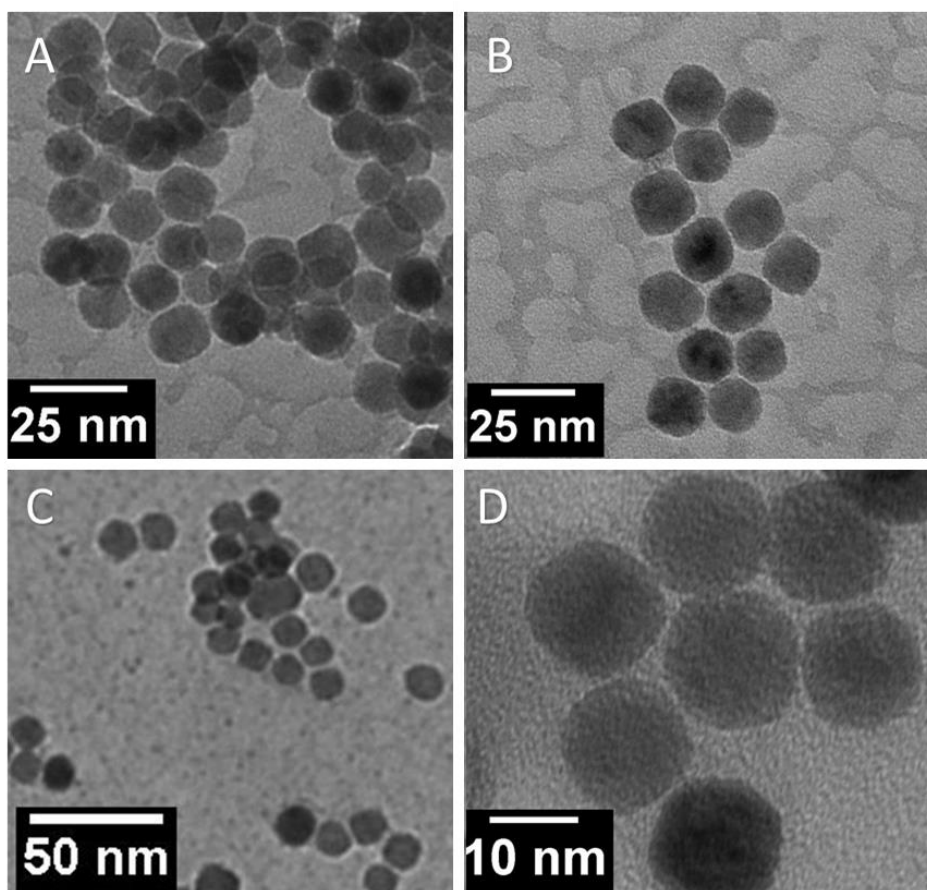

**Figure S1:** TEM images of iron oxide particles with different magnification **A-B** oleic acid-capped Fe<sub>3</sub>O<sub>4</sub> nanospheres, **C-D** Fe<sub>3</sub>O<sub>4</sub> NPs after the removal of oleic acid

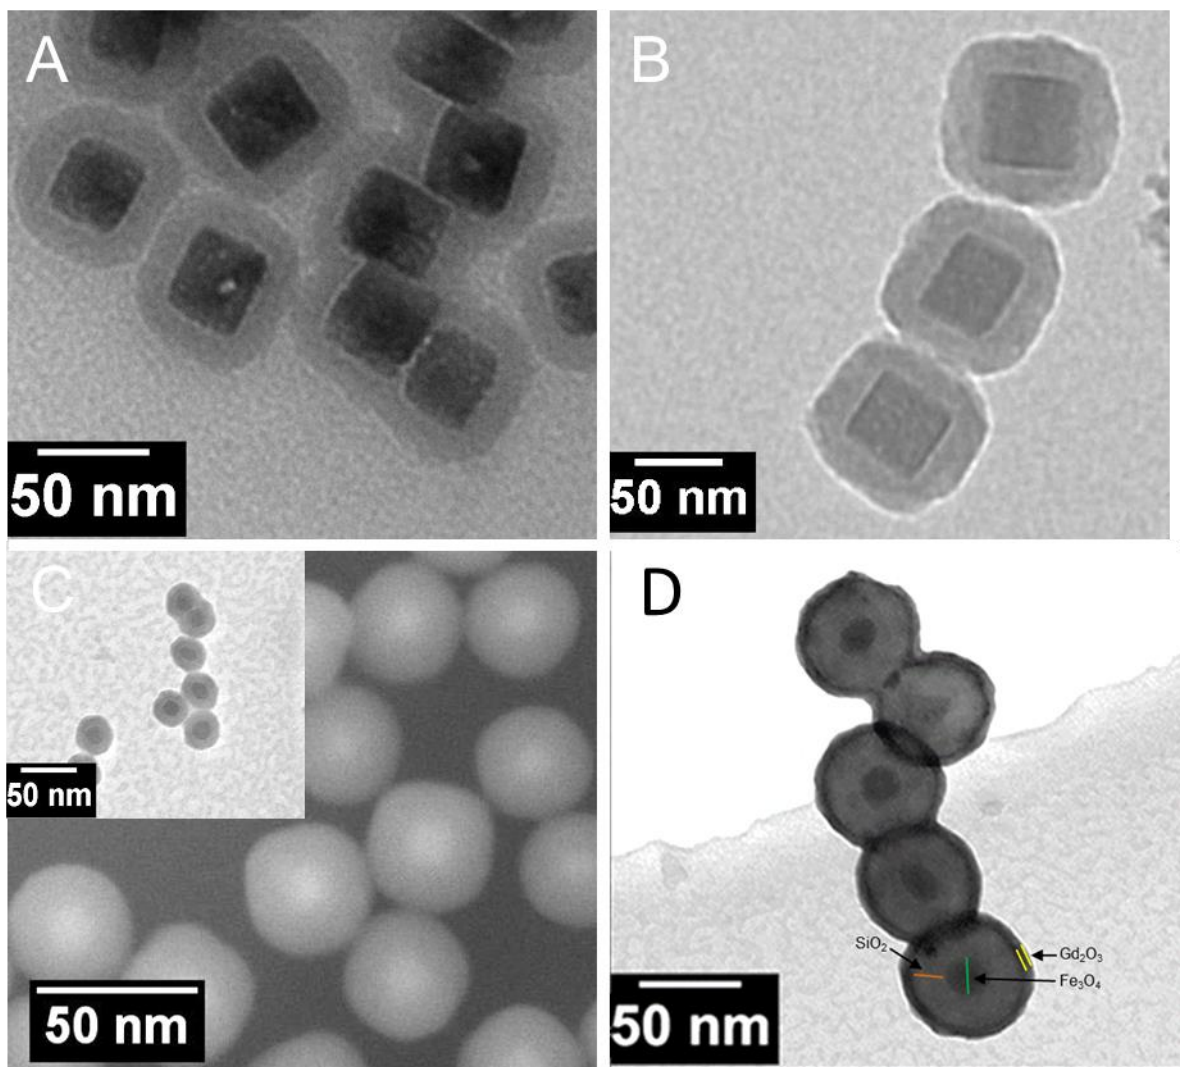

**Figure S2:** A-B: TEM images with different magnification of SiO<sub>2</sub>@Fe<sub>3</sub>O<sub>4</sub>(cubes) NPs, C- SEM image of SiO<sub>2</sub>@Fe<sub>3</sub>O<sub>4</sub>(spheres) NPs, and D- TEM image of Gd<sub>2</sub>O<sub>3</sub>@SiO<sub>2</sub>@Fe<sub>3</sub>O<sub>4</sub>(spheres) showing the clear demarcation of thin layer of gadolinium oxide ( $15 \pm 5$  nm) on core shell structure.

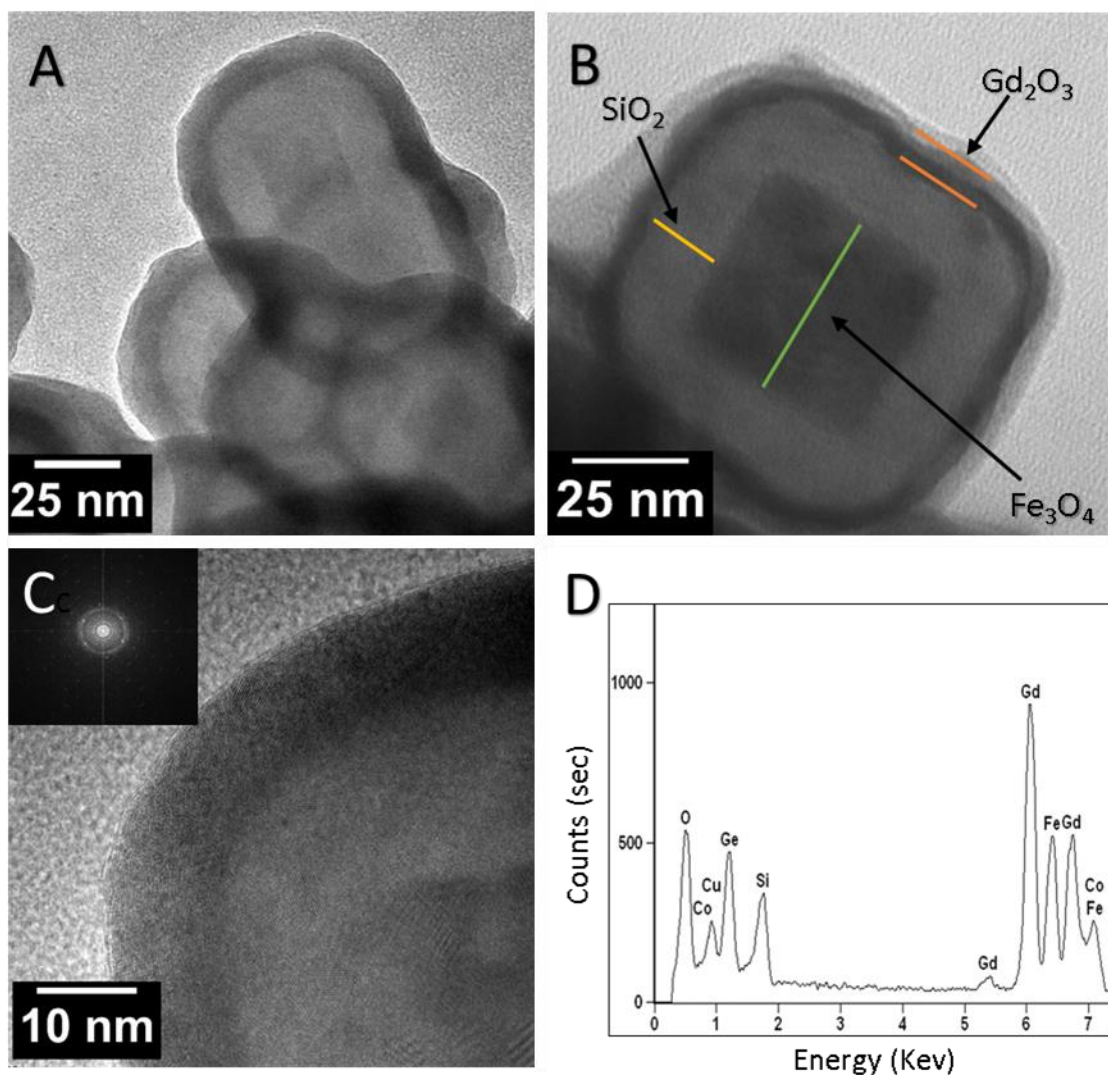

**Figure S3:** A-B- TEM Images of  $\text{Gd}_2\text{O}_3@\text{SiO}_2@\text{Fe}_3\text{O}_4(\text{cubes})$  nanocarriers C- High resolution TEM of  $\text{Gd}_2\text{O}_3@\text{SiO}_2@\text{Fe}_3\text{O}_4(\text{cubes})$  carriers (the inset for SAED pattern), and D- EDX analysis of  $\text{Gd}_2\text{O}_3@\text{SiO}_2@\text{Fe}_3\text{O}_4(\text{cubes})$  nanocarriers

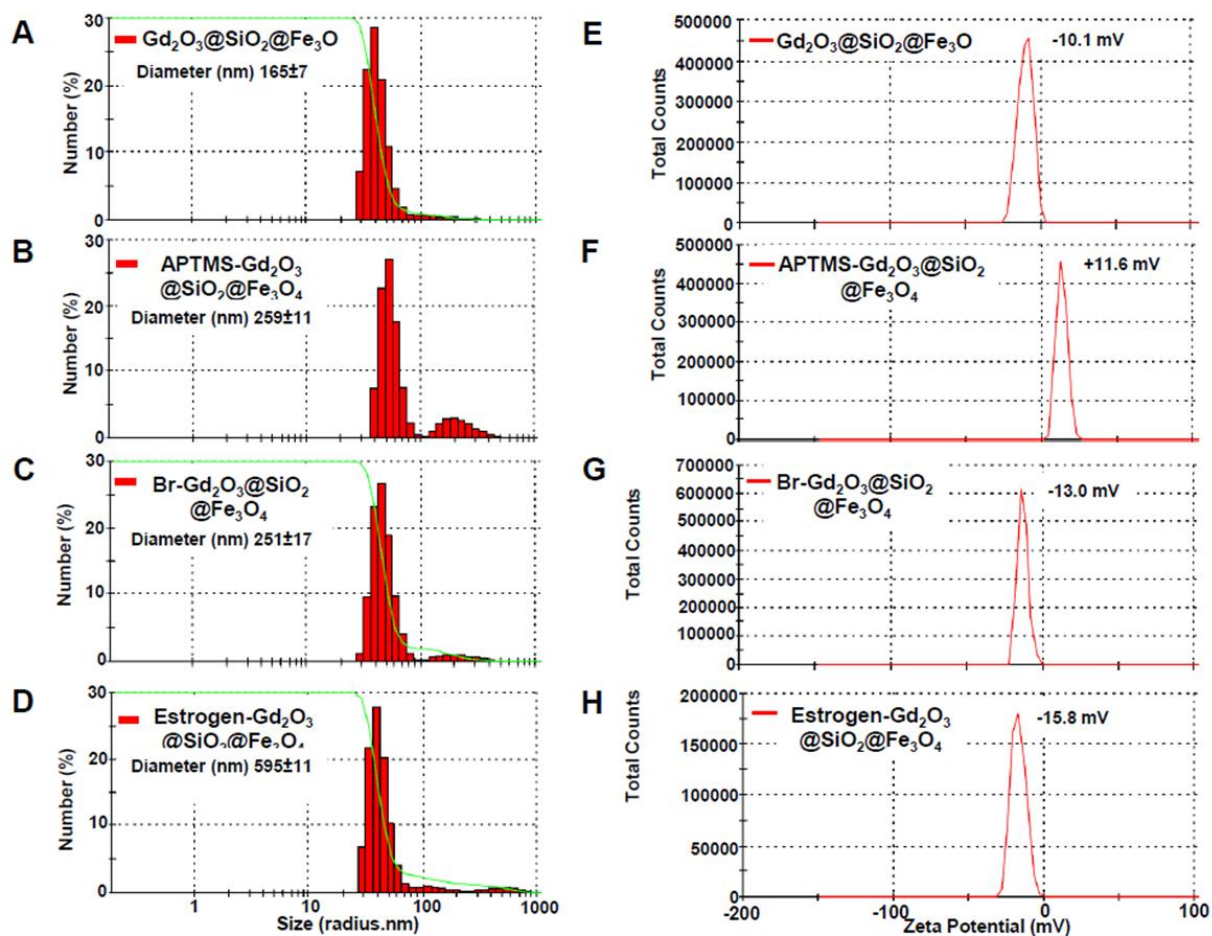

**Figure S4: A-D-** Dynamic light scattering of the nanocarriers (cube shaped iron oxide as a core) in water showed an increase in average hydrodynamic diameter of nanocarriers after different conjugation steps. **E-H-** Zeta potential measurements displayed a change in surface charge after the attachment of different molecule used for the conjugation of estrogen molecules.

**Table S1** DLS and Zeta potential

| Nanocarriers                                                                                      | DLS<br>(d.nm) | Zeta<br>potential<br>(mV) |
|---------------------------------------------------------------------------------------------------|---------------|---------------------------|
| Gd <sub>2</sub> O <sub>3</sub> @SiO <sub>2</sub> @Fe <sub>3</sub> O <sub>4</sub> (cube as a core) | 165 ±7        | -10.1                     |
| APTMs-Gd <sub>2</sub> O <sub>3</sub> @SiO <sub>2</sub> @Fe <sub>3</sub> O <sub>4</sub>            | 259 ±11       | +11.6                     |
| Br-Gd <sub>2</sub> O <sub>3</sub> @SiO <sub>2</sub> @Fe <sub>3</sub> O <sub>4</sub>               | 251 ±17       | -13.0                     |
| estrogen-Gd <sub>2</sub> O <sub>3</sub> @SiO <sub>2</sub> @Fe <sub>3</sub> O <sub>4</sub>         | 595 ±11       | -15.8                     |

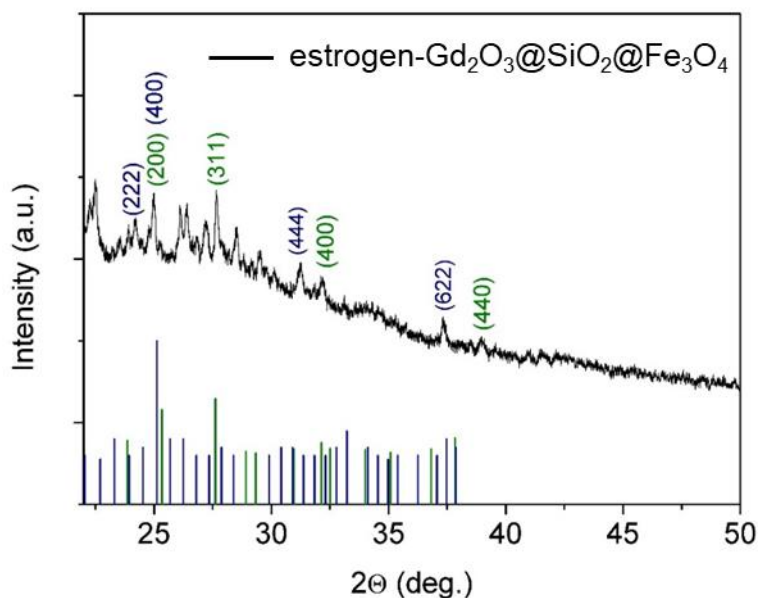

**Figure S5:** XRD diffraction pattern of Gd<sub>2</sub>O<sub>3</sub>@SiO<sub>2</sub>@Fe<sub>3</sub>O<sub>4</sub> NPs after conjugation of estrogen via click reaction. The references for magnetite (JCPDS C72-2303) is in green, and for Gd<sub>2</sub>O<sub>3</sub> (JCPDS C12-0797) in blue.

## FITC-Gd<sub>2</sub>O<sub>3</sub> core shell structure

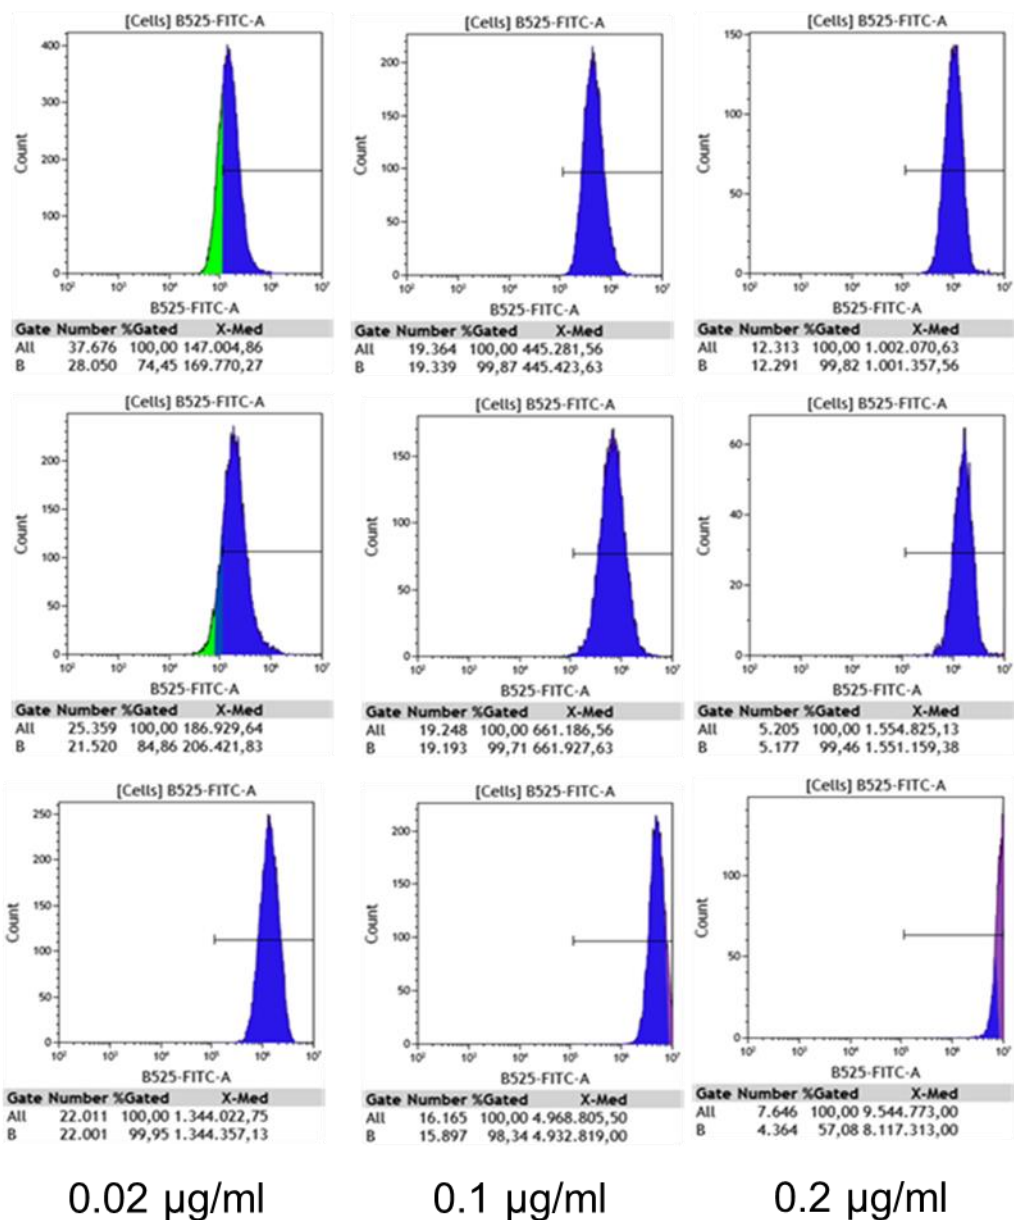

**Figure S6:** Flow cytometry measurements of FITC conjugated bare-Gd<sub>2</sub>O<sub>3</sub>@SiO<sub>2</sub>@Fe<sub>3</sub>O<sub>4</sub> carriers with breast cancer cell line MCF7.

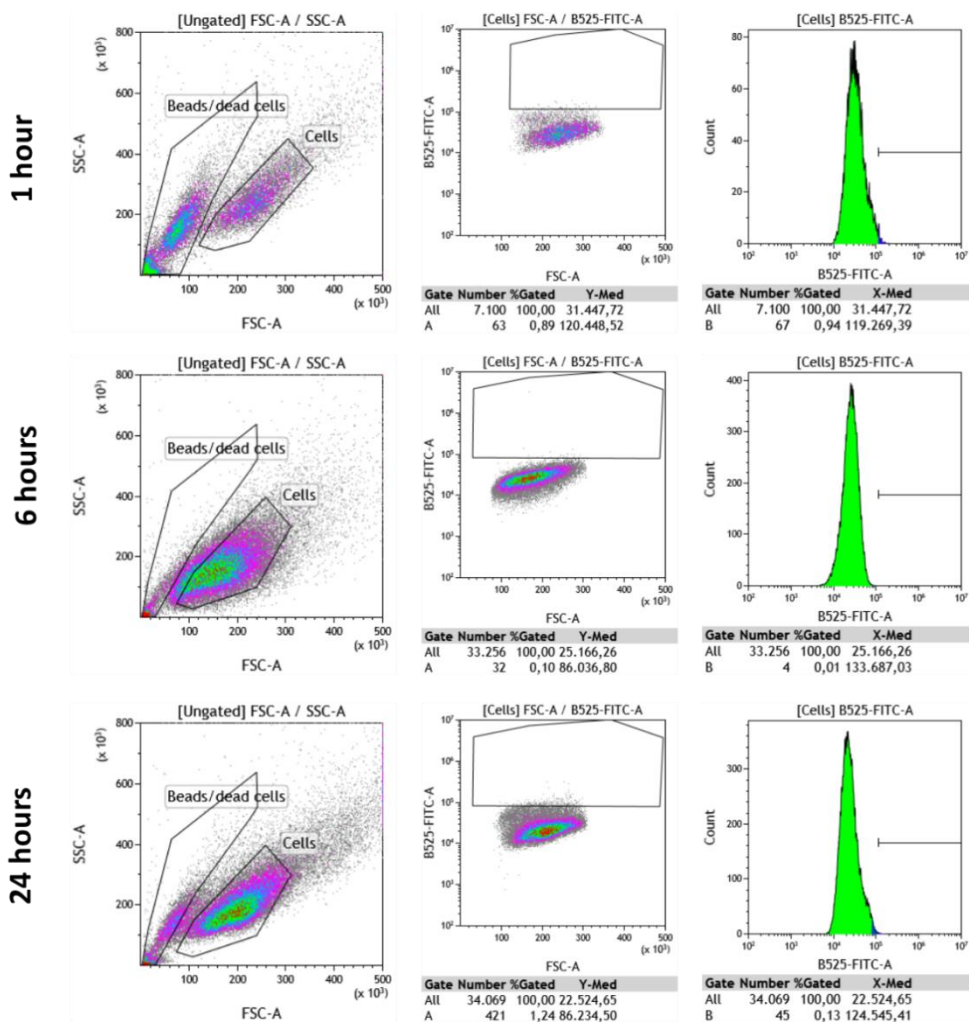

**Figure S7:** Flow cytometry measurements of pure MCF7 breast cancer cells without the addition of nanocarriers.

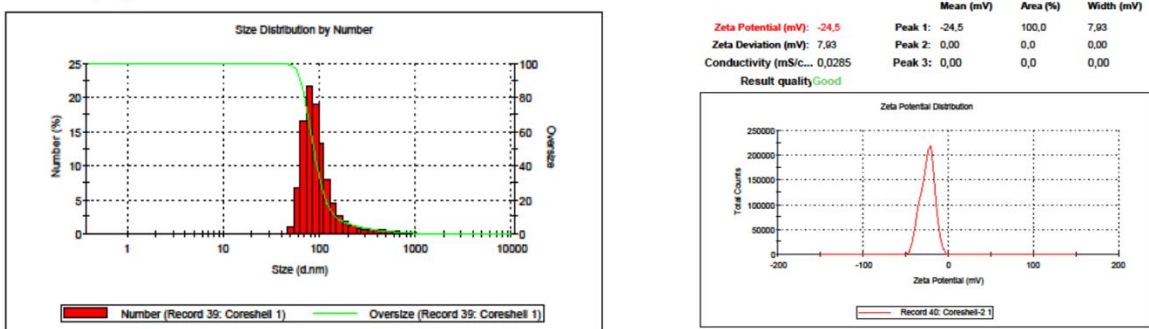

**Figure S8:** Dynamic light scattering of the nanocarriers (spherical iron oxide as a core) in water showed an increase in average hydrodynamic diameter of nanocarriers as compared to TEM analysis. Zeta potential measurements displayed a negative charge when no surface linker or ligand is attached.
